# Supplementary material for: Electrolysis of Sulfur Waste to Capture and Store CO2
Source: Research Square preprint supplement (doi:10.21203/rs.3.rs-5200500/v1), 2025-05-28
Supplement: Supplementary file 1 [file 263ebdbaff74480872629958.pdf]

# Supplementary Materials for

## **Electrolysis of sulfur waste to capture and store CO<sub>2</sub>**

Douglas J.D. Pimlott, Gaopeng Jiang, Aubry S. R. Williams, Siwei Ma, Shaoxuan Ren, Tengxiao

Ji, Monika Stolar, and Curtis P. Berlinguette

Corresponding author: Curtis P. Berlinguette, [cberling@chem.ubc.ca](mailto:cberling@chem.ubc.ca)

### **The PDF file includes:**

Methods

Supplementary Figs. 1 to 11

Supplementary Table 1

Supplementary Notes 1 to 3

References (1)

## Methods

### **Mg<sup>2+</sup>-blocking membrane synthesis**

The membrane modifications were performed in a beaker containing the reagents, leading to a two-step modification. The protons of the Nafion™ membrane were first ion-exchanged with protonated aniline using a 1 vol% aniline in 1 M HCl aqueous solution. After rinsing, the beaker was then filled with a 0.2 M K<sub>2</sub>S<sub>2</sub>O<sub>8</sub> aqueous solution to induce the polymerization for 1 hour. The Mg<sup>2+</sup> blocking membranes were stored in 1 M HCl for a minimal 24 hours prior to use.

### **Anode preparation**

To fabricate carbon composite electrodes for sulfite electrolysis, a catalyst ink was prepared by mixing 8 mg of 50% Pt 50% HSA Ketjenblack and 8 μL of D2020 Nafion dispersion (20% wt) in 8 mL of ethanol. The catalyst ink was then deposited on the Freudenberg H23 carbon paper using a commercial gravity-fed pneumatic spray-coater to make the electrode (geometric area: 4 cm<sup>2</sup>) with Pt loadings of 1 ± 0.1 mg cm<sup>-2</sup>.

### **Precipitate characterization**

Scanning electron microscopy (SEM) was performed using a FEI Helios NanoLab 650 dual beam scanning electron microscope with an accelerating voltage of 5.0 keV and a beam current of 50 pA.

Powder X-ray diffraction (XRD) was performed using a Rigaku SmartLab instrument with a PhotonMax high-flux 9 kW rotating anode X-ray source. Highscore (Plus) search-and-match was used for peak analysis.

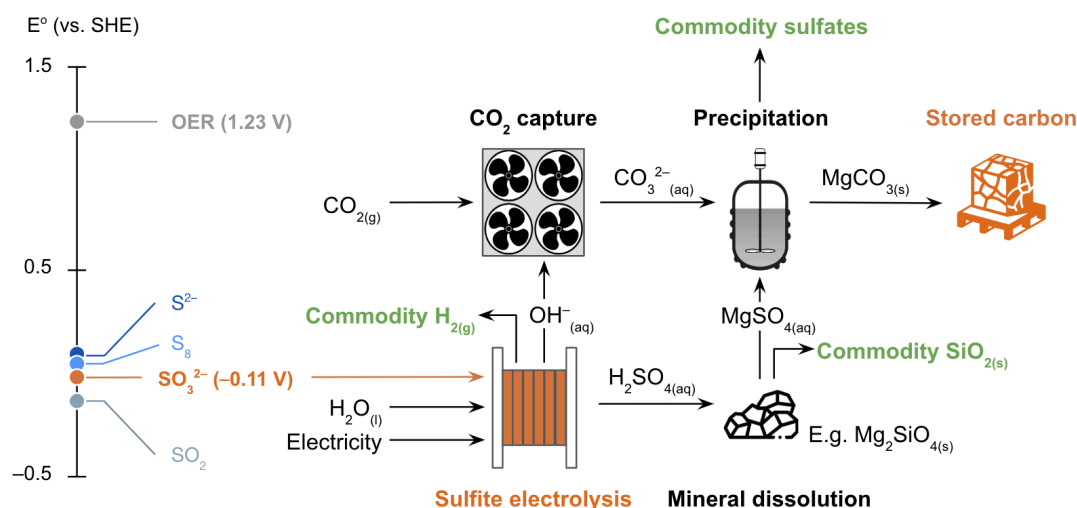

**Supplementary Fig. 1. Sulfur waste to drive carbon capture and storage.** Standard potentials for sulfur compounds (left) and process diagram of  $CO_2$  capture and storage using sulfite (right).

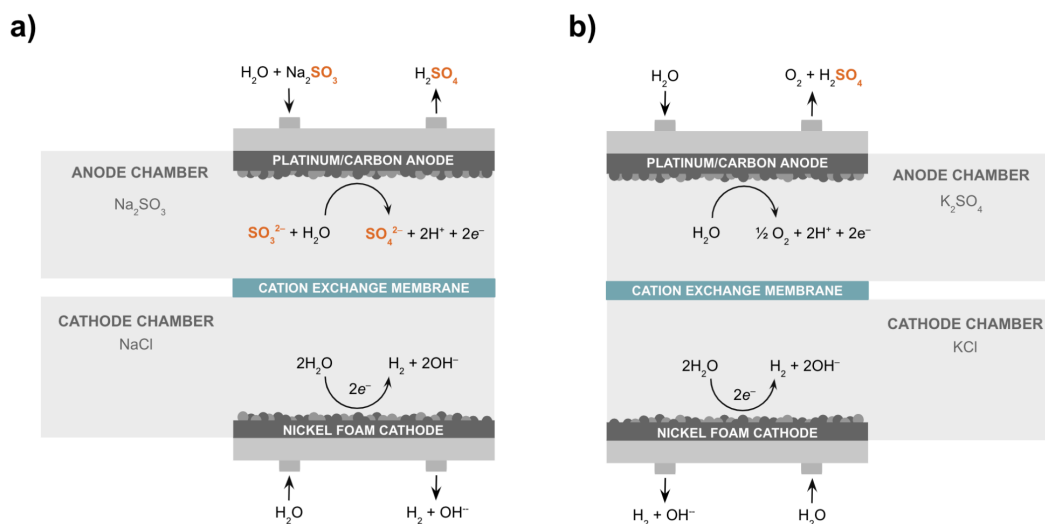

**Supplementary Fig. 2. Schematic representation of a) the sulfite electrolyzer and b) water electrolyzer used in this study.**

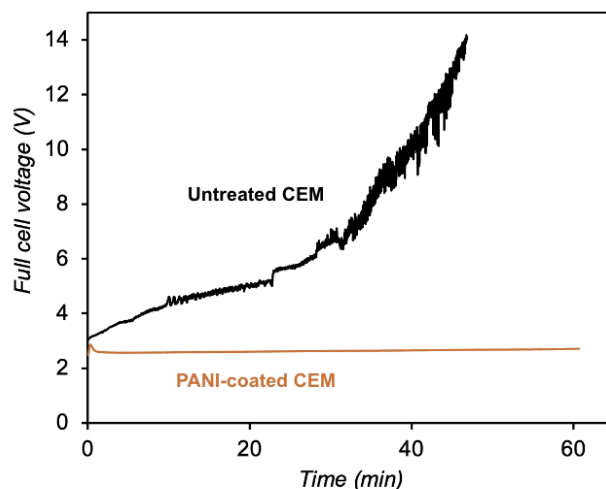

**Supplementary Fig. 3. Membrane voltage and ion transport.** (A) Full cell voltage of the sulfite electrolyzer during electrolysis at  $100 \text{ mA cm}^{-2}$  with an anolyte containing  $0.1 \text{ M SO}_3^{2-}$  and  $30 \text{ g L}^{-1}$  of milled  $\text{Mg}_2\text{SiO}_4$ . This experiment was conducted with an untreated CEM (black) and a PANI-coated CEM (orange).

a)

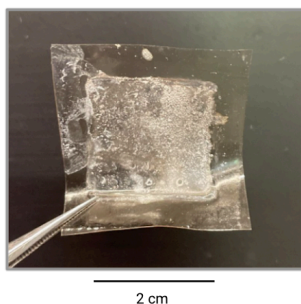

b)

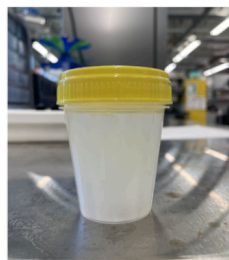

**Supplementary Fig. 4.** a) Unmodified Nafion CEM and b) catholyte after 60 minutes of electrolysis at  $100 \text{ mA cm}^{-2}$  in the sulfite electrolyzer using an anolyte containing  $30 \text{ g L}^{-1}$   $\text{Mg}_2\text{SiO}_4$ .

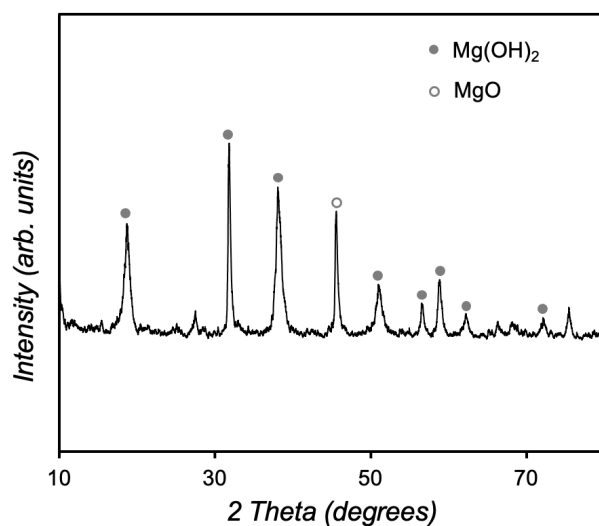

**Supplementary Fig. 5.** Powder XRD of the precipitate collected on the cathode-facing side of the Nafion CEM following electrolysis at  $100 \text{ mA cm}^{-2}$  when  $30 \text{ g L}^{-1}$  of  $\text{Mg}_2\text{SiO}_4$  was added to the anolyte of the sulfite electrolyzer containing  $0.1 \text{ M SO}_3^{2-}$ . The solids observed were primarily  $\text{Mg(OH)}_2$  and  $\text{MgO}$ .<sup>1</sup>

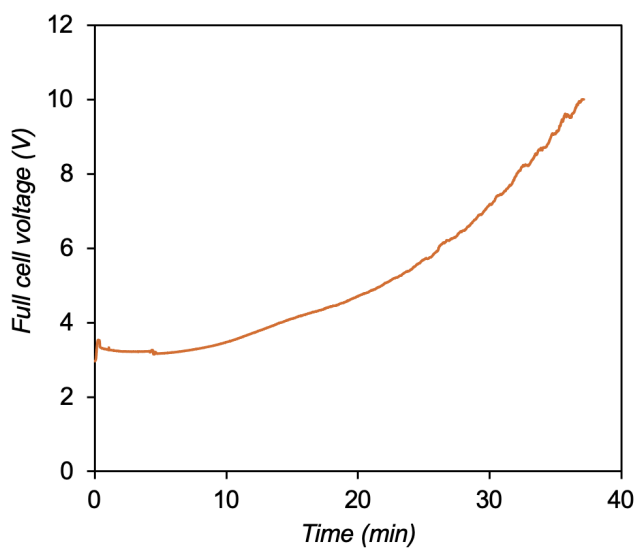

**Supplementary Fig. 6.**  $E_{\text{cell}}$  of the sulfite electrolyzer during electrolysis at  $100 \text{ mA cm}^{-2}$  when  $0.5 \text{ M}$  of  $\text{MgSO}_4$  is added to the anolyte solution containing  $0.1 \text{ SO}_3^{2-}$ .

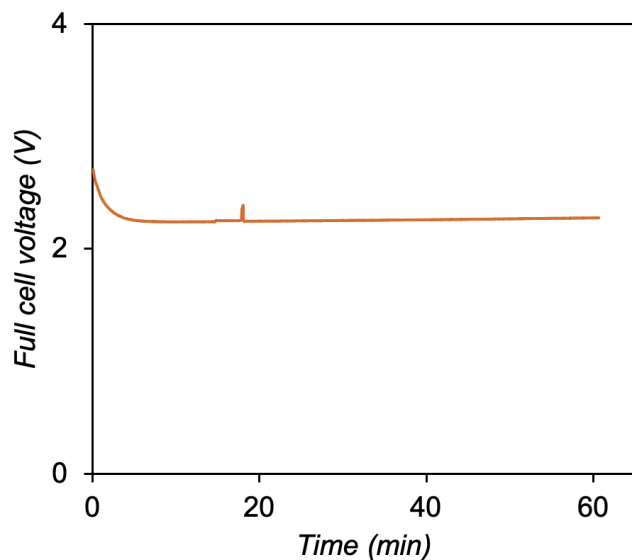

**Supplementary Fig. 7.**  $E_{\text{cell}}$  of the sulfite electrolyzer during electrolysis at  $100 \text{ mA cm}^{-2}$  using a PANI-modified CEM. The catholyte consisted of  $1.0 \text{ M NaCl}$  and the anolyte consisted of  $0.1 \text{ M Na}_2\text{SO}_3$ .

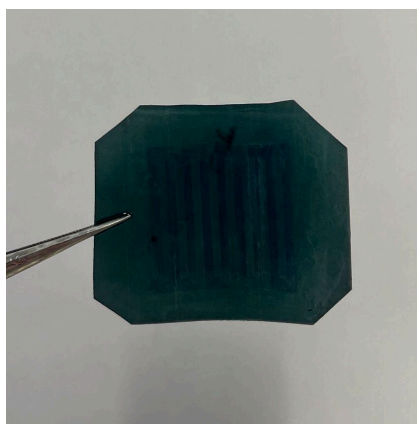

**Supplementary Fig. 8.** PANI-modified Nafion CEM following electrolysis experiments performed at  $100 \text{ mA cm}^{-2}$  and with anolyte containing  $30 \text{ g L}^{-1}$  of  $\text{Mg}_2\text{SiO}_4$ .

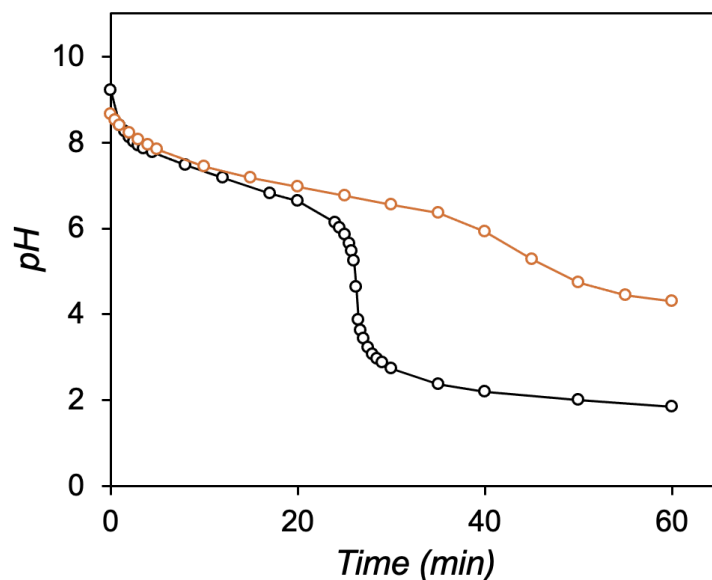

**Supplementary Fig. 9.** Anolyte pH on the sulfite electrolyzer during 60 minutes of electrolysis at  $100 \text{ mA cm}^{-2}$ . Experiments were conducted without  $\text{Mg}_2\text{SiO}_4$  (black) and with  $30 \text{ g L}^{-1}$   $\text{Mg}_2\text{SiO}_4$  (orange) in the anolyte.

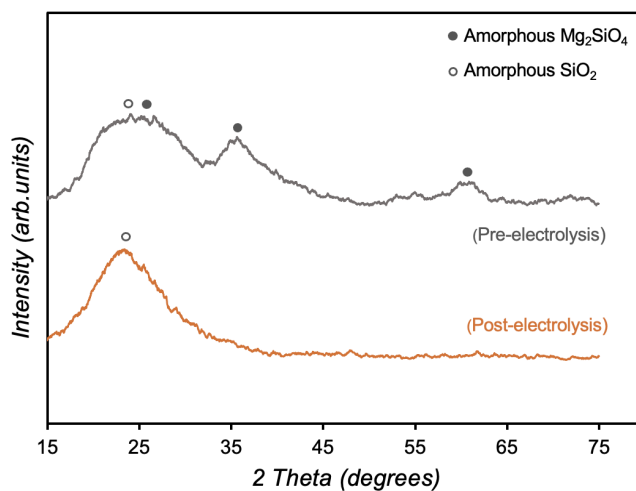

**Supplementary Fig. 10.** Powder XRD diffractograms of the solid pre-electrolysis (gray) and post-electrolysis (orange) of electrolysis at a constant applied current density of  $200 \text{ mA cm}^{-2}$ . The anolyte in this experiment was prepared by adding  $5 \text{ g L}^{-1}$  of milled  $\text{Mg}_2\text{SiO}_4$  to a solution containing  $0.2 \text{ M SO}_3^{2-}$ . This solution was fed into the electrolyzer during 60 minutes of electrolysis at a flow rate of  $100 \text{ mL min}^{-1}$ . The anolyte reservoir was stirred continuously.

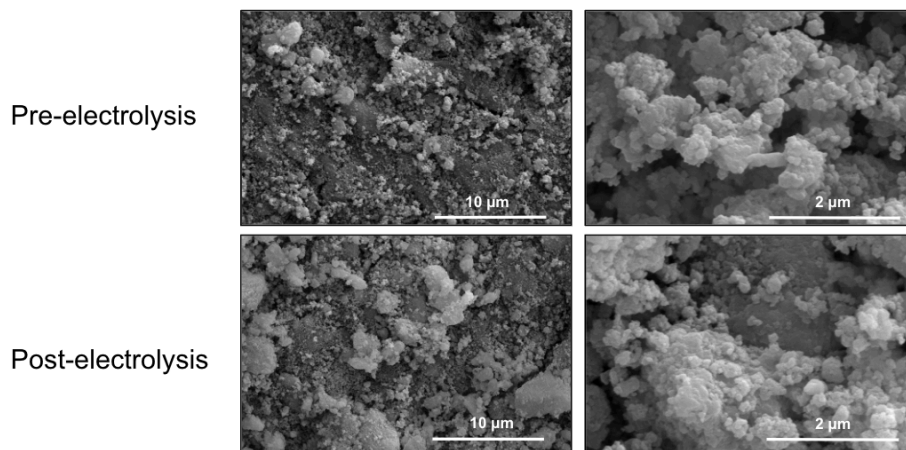

**Supplementary Fig. 11.** SEM images of the solid present in the anolyte before (top panels) and after (bottom panels) electrolysis at  $100 \text{ mA cm}^{-2}$  for 60 minutes. The anolyte consisted of  $5 \text{ g L}^{-1} \text{ Mg}_2\text{SiO}_4$  and  $0.1 \text{ M Na}_2\text{SO}_3$ .

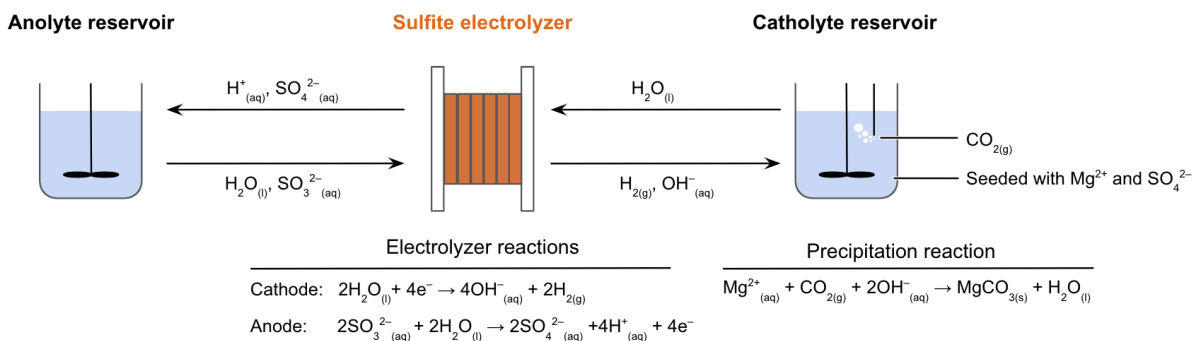

**Supplementary Fig. 12.** Setup for  $\text{CO}_2$  capture and mineralization in the sulfite electrolyzer. The electrolyzer is supplied with a  $1.0 \text{ M NaCl}$  solution seeded with  $0.5 \text{ M MgSO}_4$  to the cathode chamber. This solution is contained in a reservoir that is bubbled with  $\text{CO}_2$  during electrolysis and serves as the precipitation reactor. The anode chamber of the electrolyzer is supplied with a  $1.0 \text{ M Na}_2\text{SO}_3$  solution which is recirculated from a reservoir.



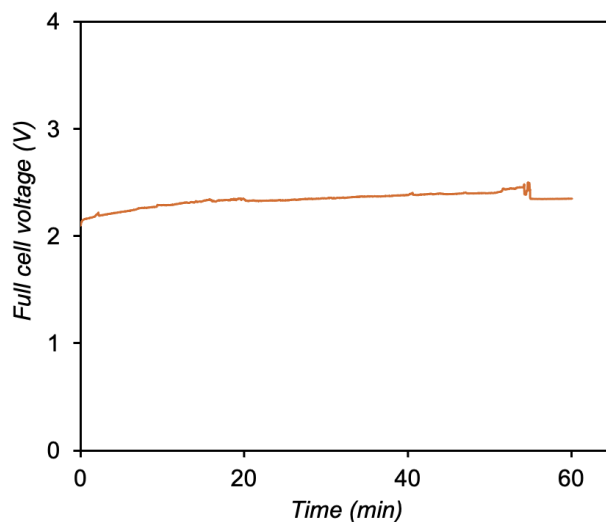

**Supplementary Fig. 13.**  $E_{\text{cell}}$  of the integrated sulfite electrolyzer during electrolysis at 100 mA  $\text{cm}^{-2}$ . The anolyte consisted of 1.0 M  $\text{Na}_2\text{SO}_3$ . The catholyte consisted of 1.0 NaCl and 0.5 M of  $\text{MgSO}_4$ .  $\text{CO}_2$  was bubbled into the catholyte to maintain a pH between 9.5–10.

**Supplementary Table 1.** Experimental Energy Intensities of the Integrated Sulfite Electrolyzer

| <i>Exp. no.</i> | <i>j (mA cm<sup>-2</sup>)</i> | <i>Voltage (V)</i> | <i>Mineralization rate (10<sup>-6</sup> mol min<sup>-1</sup>)</i> | <i>Energy Intensity (MWh ton<sup>-1</sup> CO<sub>2</sub>)</i> |
|-----------------|-------------------------------|--------------------|-------------------------------------------------------------------|---------------------------------------------------------------|
| 1               | 100                           | 2.2                | 50.7                                                              | 6.5                                                           |
| 2               | 100                           | 2.3                | 24.2                                                              | 13.8                                                          |
| 3               | 100                           | 2.2                | 61.6                                                              | 5.4                                                           |
| 4               | 200                           | 2.8                | 95.4                                                              | 8.9                                                           |
| 5               | 200                           | 3.1                | 100.8                                                             | 9.4                                                           |
| 6               | 200                           | 2.8                | 76.1                                                              | 11.2                                                          |
| 7               | 400                           | 4.2                | 132.9                                                             | 19.2                                                          |
| 8               | 400                           | 3.7                | 193.2                                                             | 11.6                                                          |
| 9               | 400                           | 3.8                | 96.6                                                              | 23.8                                                          |

**Supplementary Note 1.**Energy intensity of captured CO<sub>2</sub> using the sulfite electrolyzer (from exp. no. 3 from table S1.)

$$P_{electrolyzer} = E_{cell} \cdot j \cdot A_{elec} = (2.2 \text{ V})(0.1 \text{ A/cm}^2)(4 \text{ cm}^2) = 0.00088 \text{ kW}$$

$$m_{CO_2} = (0.51 \text{ g}_{MgCO_3 \cdot 3H_2O})(44.01 \text{ g/mol})/(138.4 \text{ g/mol}) = 0.162 \text{ g}$$

$$MWh/ton \text{ of } CO_2 = (1000000 \text{ g} / m_{CO_2})(P_{electrolyzer})/(1000 \text{ kWh/MWh})(1 \text{ h})$$

$$\begin{aligned} MWh/ton \text{ of } CO_2 &= (1000000 \text{ g} / 0.162 \text{ g})(0.00088 \text{ kWh})/(1000 \text{ kWh/MWh})(1 \text{ h}) \\ &= 5.43 \text{ MWh/ton of } CO_2 \end{aligned}$$

**Supplementary Note 2.**Cost per ton of captured CO<sub>2</sub> using the sulfite electrolyzer (from exp. no. 3 from table S1.)Assumed electricity cost of \$ 0.03 kWh<sup>-1</sup>

$$P_{electrolyzer} = E_{cell} \cdot j \cdot A_{elec} = (2.2 \text{ V})(0.1 \text{ A/cm}^2)(4 \text{ cm}^2) = 0.00088 \text{ kW}$$

$$m_{CO_2} = (0.51 \text{ g}_{MgCO_3 \cdot 3H_2O})(44.01 \text{ g/mol})/(138.4 \text{ g/mol}) = 0.162 \text{ g}$$

$$$/ton \text{ of } CO_2 = (1000000 \text{ g} / 0.162 \text{ g})(0.00088 \text{ kWh})(\$0.03 \text{ kWh}^{-1}) = \$162$$

**Supplementary Note 3.**Theoretical maximum carbon storage rate at 100 mA cm<sup>-2</sup>

$$mol_{OH^-} = C \cdot A \cdot V \cdot t / N_{A \cdot j}$$

$$mol_{OH^-} = (6.24E18 \text{ e}^-)(0.4 \text{ A})(0.1 \text{ L})(3600 \text{ s})/(6.022E23 \text{ mol}^{-1}) = 0.0149 \text{ mol}$$

$$mol_{carbonate} = 0.5 \cdot mol_{OH^-} = 0.0075 \text{ mol}$$

$$mol_{\text{nesquehonite}} = mol_{\text{carbonate}} = 0.0075 \text{ mol}$$

$$\text{Carbon storage rate} = (0.0075 \text{ mol}) / (60 \text{ min}) = 1.25 \times 10^{-4} \text{ mol min}^{-1}$$

## References

1. Groom, C. R., Bruno, I. J., Lightfoot, M. P. & Ward, S. C. The Cambridge Structural Database. *Acta Crystallogr B Struct Sci Cryst Eng Mater* **72**, 171–179 (2016).
